# Supplementary material
Source: publisher figshare collection journal article supplement (https://sage.figshare.com/ndownloader/files/24101756)
Supplement: Supplementary file 1 [file 24101756]

Supplementary data: Chow composition

| Ingredients                                | On the basis of kg of the dry substance |
|--------------------------------------------|-----------------------------------------|
| Moisture (max)                             | 12%                                     |
| Ash (max)                                  | 8%                                      |
| For total digested food compounds (min)    | 65%                                     |
| Energy (min)                               | 2.4 maga cal/ kg                        |
| Protein (min)                              | 13%                                     |
| Fibers (min)                               | 16%                                     |
| Fat (max)                                  | 5%                                      |
| Dissolved fibers in neutral solution (min) | 35%                                     |
| Calcium (min)                              | 0.60%                                   |
| Phosphorus (min)                           | 0.30%                                   |
| sodium (min)                               | 0.12%                                   |
| Potassium (min)                            | 0.8%                                    |
| Magnesium (min)                            | 0.15%                                   |
| Iron (min)                                 | 30mg                                    |
| Cobalt (min)                               | 0.1mg                                   |
| Manganese (min)                            | 20mg                                    |
| Copper (min)                               | 7mg                                     |
| Selenium (min)                             | 0.1mg                                   |
| Zinc (min)                                 | 33mg                                    |
| Iodine (min)                               | 0.8mg                                   |
| Vit A (min)                                | 1800 IU                                 |
| Vit E (min)                                | 30 IU                                   |
